# Supplementary material
Source: PubMed Central journal article supplement (PMC7372601)
Supplement: NIHMS1604229-supplement-1.pdf [file NIHMS1604229-supplement-1.pdf]

948 **Supplemental References**

949

950

- 951 27 Ellman, R., Maxwell, C., Finch, R. & Shayo, D. Malaria and anaemia at different altitudes in the Muheza  
952 district of Tanzania: childhood morbidity in relation to level of exposure to infection. *Annals of tropical*  
953 *medicine and parasitology* **92**, 741-753 (1998).
- 954 28 Kabyemela, E. R., Fried, M., Kurtis, J. D., Mutabingwa, T. K. & Duffy, P. E. Decreased susceptibility to  
955 *Plasmodium falciparum* infection in pregnant women with iron deficiency. *J. Infect. Dis.* **198**, 163-166,  
956 doi:10.1086/589512 (2008).
- 957 29 Kurtis, J. D., Lanar, D. E., Opollo, M. & Duffy, P. E. Interleukin-10 responses to liver-stage antigen 1  
958 predict human resistance to *Plasmodium falciparum*. *Infect Immun* **67**, 3424-3429 (1999).

959 30 Beier, J. C. *et al.* Plasmodium falciparum incidence relative to entomologic inoculation rates at a site  
960 proposed for testing malaria vaccines in western Kenya. *Am J Trop Med Hyg* **50**, 529-536 (1994).

961 31 Friedman, J. F. *et al.* Malaria is related to decreased nutritional status among male adolescents and adults  
962 in the setting of intense perennial transmission. *J. Infect. Dis.* **188**, 449-457, doi:10.1086/376596 (2003).

963 32 Gourley, I. S., Kurtis, J. D., Kamoun, M., Amon, J. J. & Duffy, P. E. Profound bias in interferon-gamma  
964 and interleukin-6 allele frequencies in western Kenya, where severe malarial anemia is common in children.  
965 *J. Infect. Dis.* **186**, 1007-1012, doi:10.1086/342947 (2002).

966 33 Gunasekaran, K., Jambulingam, P., Sadanandane, C., Sahu, S. S. & Das, P. K. Reliability of light trap  
967 sampling for Anopheles fluviatilis, a vector of malaria. *Acta Trop* **58**, 1-11 (1994).

968 34 Trager, W. & Jensen, J. B. Human malaria parasites in continuous culture. *Science* **193**, 673-675 (1976).

969 35 Bejon, P. *et al.* Effect of the pre-erythrocytic candidate malaria vaccine RTS,S/AS01E on blood stage  
970 immunity in young children. *The Journal of infectious diseases* **204**, 9-18, doi:10.1093/infdis/jir222 (2011).

971 36 Malkin, E. M. *et al.* Phase 1 clinical trial of apical membrane antigen 1: an asexual blood-stage vaccine for  
972 Plasmodium falciparum malaria. *Infection and immunity* **73**, 3677-3685, doi:10.1128/IAI.73.6.3677-  
973 3685.2005 (2005).

974 37 Long, C. Growth Inhibition Assay Procedure.  
975 [http://www.niaid.nih.gov/labsandresources/labs/aboutlabs/lmvr/malariaimmunologysection/Pages/long.a](http://www.niaid.nih.gov/labsandresources/labs/aboutlabs/lmvr/malariaimmunologysection/Pages/long.aspx#niaid_inlineNav_Anchor)  
976 [spx#niaid\\_inlineNav\\_Anchor](http://www.niaid.nih.gov/labsandresources/labs/aboutlabs/lmvr/malariaimmunologysection/Pages/long.aspx#niaid_inlineNav_Anchor) (2013).

977 38 Lambros, C. & Vanderberg, J. P. Synchronization of Plasmodium falciparum erythrocytic stages in culture.  
978 *The Journal of parasitology* **65**, 418-420 (1979).

979 39 Rudlaff, R. M., Kraemer, S., Strelva, V. A. & Dvorin, J. D. An essential contractile ring protein controls cell  
980 division in Plasmodium falciparum. *Nat Commun* **10**, 2181, doi:10.1038/s41467-019-10214-z (2019).

981 40 Pulcini, S. *et al.* Mutations in the Plasmodium falciparum chloroquine resistance transporter, PfCRT,  
982 enlarge the parasite's food vacuole and alter drug sensitivities. *Sci Rep* **5**, 14552, doi:10.1038/srep14552  
983 (2015).

984 41 Cham, G. K. *et al.* A semi-automated multiplex high-throughput assay for measuring IgG antibodies against  
985 Plasmodium falciparum erythrocyte membrane protein 1 (PfEMP1) domains in small volumes of plasma.  
986 *Malar J* **7**, 108, doi:10.1186/1475-2875-7-108 (2008).

987 42 Oleinikov, A. V. *et al.* High throughput functional assays of the variant antigen PfEMP1 reveal a single  
988 domain in the 3D7 Plasmodium falciparum genome that binds ICAM1 with high affinity and is targeted by  
989 naturally acquired neutralizing antibodies. *PLoS Pathog* **5**, e1000386. Epub 1002009 Apr 1000317. (2009).

990 43 Oleinikov, A. V. *et al.* Effects of sex, parity, and sequence variation on seroreactivity to candidate  
991 pregnancy malaria vaccine antigens. *The Journal of infectious diseases* **196**, 155-164, doi:10.1086/518513  
992 (2007).

993 44 Oleinikov, A. V. *et al.* A Plasma Survey Using 38 PfEMP1 Domains Reveals Frequent Recognition of the  
994 Plasmodium falciparum Antigen VAR2CSA among Young Tanzanian Children. *PLoS ONE* **7**, e31011,  
995 doi:10.1371/journal.pone.0031011 (2012).

996 45 Pardi, N., Muramatsu, H., Weissman, D. & Kariko, K. In vitro transcription of long RNA containing  
997 modified nucleosides. *Methods in molecular biology* **969**, 29-42, doi:10.1007/978-1-62703-260-5\_2  
998 (2013).

999 46 Thess, A. *et al.* Sequence-engineered mRNA Without Chemical Nucleoside Modifications Enables an  
1000 Effective Protein Therapy in Large Animals. *Mol Ther* **23**, 1456-1464, doi:10.1038/mt.2015.103 (2015).

1001 47 Weissman, D., Pardi, N., Muramatsu, H. & Kariko, K. HPLC purification of in vitro transcribed long RNA.  
1002 *Methods in molecular biology* **969**, 43-54, doi:10.1007/978-1-62703-260-5\_3 (2013).

1003 48 Maier, M. A. *et al.* Biodegradable lipids enabling rapidly eliminated lipid nanoparticles for systemic  
1004 delivery of RNAi therapeutics. *Molecular therapy : the journal of the American Society of Gene Therapy*  
1005 **21**, 1570-1578, doi:10.1038/mt.2013.124 (2013).

1006 49 Jayaraman, M. *et al.* Maximizing the potency of siRNA lipid nanoparticles for hepatic gene silencing in  
1007 vivo. *Angewandte Chemie* **51**, 8529-8533, doi:10.1002/anie.201203263 (2012).

1008

## Supplementary Table 1 | Epidemiologic characteristics of resistant and susceptible individuals used in differential screening assays

| Variable                                                                            | Resistant  | Susceptible | P value* |
|-------------------------------------------------------------------------------------|------------|-------------|----------|
| Number of subjects                                                                  | 12         | 14          | -        |
| Hemoglobin Phenotype (% Sickle trait)                                               | 25         | 14.3        | 0.918    |
| Sex (% female)                                                                      | 25         | 50          | 0.190    |
| Weeks of follow-up (median [IQR])                                                   | 143 [23.5] | 158 [16]    | 0.047    |
| # Of blood smears from age 2-3.5 years (median [IQR])                               | 14 [7.4]   | 21 [8.5]    | 0.0102   |
| # Of positive blood smears from age 2-3.5 years (median [IQR])                      | 2.1 [1]    | 5.8 [3.5]   | 0.0024   |
| # Of anti-malarial treatment before 2 (median [IQR])                                | 1.3 [1.1]  | 2.3 [3.1]   | 0.133    |
| Pregnancy malaria (%)                                                               | 25         | 21.4        | 0.300    |
| Maternal age (yrs, median [IQR])                                                    | 27 [8]     | 26.5 [6]    | 0.833    |
| Birth Season (% in high season <sup>‡</sup> )                                       | 41.7       | 42.9        | 0.952    |
| Subjects using bed net (%)                                                          | 0          | 100         | <0.001   |
| # Of previous pregnancies (median [IQR] <sup>†</sup> )                              | 2 [2]      | 2.3 [2.1]   | 0.760    |
| Parasite density (parasites per 200 WBCs <sup>§</sup> ) at 2 year blood draw        | 0          | 0           | 1        |
| Mean Parasite density (parasites per 200 WBCs) from age 0-2 years (median [IQR])    | 623 [952]  | 1400 [736]  | 0.1569   |
| Mean Parasite density (parasites per 200 WBCs) from age 2 -3.5 years (median [IQR]) | 7.1 [2.9]  | 2258 [1569] | <0.001   |

\* Comparisons of categorical variables by 2 tailed Fisher's exact test. Comparisons of continuous variables by two-sided Mann-Whitney U test

<sup>†</sup> Interquartile range

<sup>‡</sup> May-October

<sup>§</sup> White blood cells

**Supplementary Table 2 | Parasite genes identified by differential bio-panning of phage display library. Results represent sequencing data from 100 phage clones.**

| Gene name                                      | Gene ID & length in bp<br>(Introns spliced out) | % Of Clones | Fragment size & nt.<br>position in the gene |
|------------------------------------------------|-------------------------------------------------|-------------|---------------------------------------------|
| Glutamic acid-rich protein (GARP)              | PF3D7_0113000 (2022)                            | 37          | 465 (1558-2022)                             |
| Glutamic acid-rich protein (GARP)              | PF3D7_0113000 (2022)                            | 5           | 246 (1777-2022)                             |
| Glutamic acid-rich protein (GARP)              | PF3D7_0113000 (2022)                            | 2           | 801 (1222-2022)                             |
| Heat shock protein 110 (HSP110)                | PF3D7_0708800 (2622)                            | 2           | 650 (1764-2414)                             |
| Knob-associated histidine-rich protein (KAHRP) | PF3D7_0202000 (2312)                            | 4           | 241(1309-1549)                              |
| Conserved Plasmodium protein                   | PF3D7_0418300 (2979)                            | 2           | 643 (1811-2453)                             |
| Rhoptry-associated membrane antigen (RAMA)     | PF3D7_0707300 (2115)                            | 3           | 451 (953-1403)                              |
| High mobility group protein B1 (HMGPB1)        | PF3D7_1202900 (294)                             | 2           | 140 (153-294)                               |
| Plasmodium exported protein (PHISTc)           | PF3D7_0936800 (1152)                            | 3           | 303 (695-998)                               |
| Serine/threonine protein kinase, FIKK family   | PF3D7_1039000 (3107)                            | 1           | 390 (1156-1546)                             |
| Ornithine aminotransferase                     | PF3D7_0608800 (1245)                            | 1           | 332 (914-1245)                              |
| 18S ribosomal RNA                              | PF3D7_0531600 (2092)                            | 26          | 670 (399-1068)                              |
| 60S ribosomal protein L5, putative             | PF3D7_1424100 (549)                             | 11          | 460 (1-459)                                 |

**Supplementary Table 3 | Primers used in construction of 3D7-PfGARP KD and 3D7-PfGARP KO parasites.**

| Oligo Number | Sequence                                                                                                                                                                                                                                                                                                                                                                                                                                             |
|--------------|------------------------------------------------------------------------------------------------------------------------------------------------------------------------------------------------------------------------------------------------------------------------------------------------------------------------------------------------------------------------------------------------------------------------------------------------------|
| ojDD1027     | gta <sup>g</sup> cg <sup>g</sup> cg <sup>c</sup> cg <sup>c</sup> CCAAGTCCATTGACAGACG                                                                                                                                                                                                                                                                                                                                                                 |
| ojDD4507     | CTTgTGgTTgTccTcTcTaGGgACaACgTTgACICGgCCaATIGTACCTATTAATTGCTCTTGTATGGATAAG                                                                                                                                                                                                                                                                                                                                                                            |
| ojDD2933     | CTGCTGCTGAGTACTATCAAGTC                                                                                                                                                                                                                                                                                                                                                                                                                              |
| ojDD4279     | CTACTTTGTTCTGATCATATG                                                                                                                                                                                                                                                                                                                                                                                                                                |
| ojDD4280     | TTCTTTTTGGGGGGCTTTCATG                                                                                                                                                                                                                                                                                                                                                                                                                               |
| ojDD4506     | CaATIGGICGgGTcAAcGTIGTcCClAGgAGgGAcAAcCAcAAGAAGAAAATGGCAAAAATAGAAGAAGCAG                                                                                                                                                                                                                                                                                                                                                                             |
| ojDD3566     | tgcatgccatggTATTTTTGCATTTTTCTTAAATTC                                                                                                                                                                                                                                                                                                                                                                                                                 |
| ojDD3563     | CAAAAAGAAAAATCTTAgatcCCAAGTCCATTGACAGACGTAACACTACCCAG                                                                                                                                                                                                                                                                                                                                                                                                |
| ojDD4507     | CTTgTGgTTgTccTcTcTaGGgACaACgTTgACICGgCCaATIGTACCTATTAATTGCTCTTGTATGGATAAG                                                                                                                                                                                                                                                                                                                                                                            |
| ojDD3561     | catgcagcgccgcGTCTCTGTTTTATTGTAATGTTTTATTG                                                                                                                                                                                                                                                                                                                                                                                                            |
| ojDD3562     | TCTGTCAATGGACTTGGgatacTAAGATTTTTCTTTTTGGGGGGCTTTC                                                                                                                                                                                                                                                                                                                                                                                                    |
| ojDD3058     | TTATATAAGAACATATTTTAAATCTAgaattcGGATTTCTACACATCTTGAGGTTT                                                                                                                                                                                                                                                                                                                                                                                             |
| ojDD4088     | GCTCTAAACltaggacgtgllaatgtaglacAAATTATATACTTAATATGAAATATG                                                                                                                                                                                                                                                                                                                                                                                            |
| ojDD3059     | GTAAGGAGAAAAATCCGCATCAGGCGCCAGCCTAGGTTTATGGTAGCCTTAAAACTTCA                                                                                                                                                                                                                                                                                                                                                                                          |
| ojDD4089     | TATAATTTgtaclacattaacacgctctaGTTTTAGAGCTAGAAATAGCAAGTTAA                                                                                                                                                                                                                                                                                                                                                                                             |
| ojDD4077     | catgcgcgccgcATTCTATAAACCTGTTAGGAATAAAGGTTAG                                                                                                                                                                                                                                                                                                                                                                                                          |
| ojDD4979     | cttaagGTTTTCTGTATTTATATATATATATATATATATTACGTTTTAAATATAC                                                                                                                                                                                                                                                                                                                                                                                              |
| ojDD5029     | catggaattcCCAGAAGAGATAATCATAAG                                                                                                                                                                                                                                                                                                                                                                                                                       |
| ojDD4083     | gatccctaggGGCTTGATTATTTTAAGGGAATAGAAC                                                                                                                                                                                                                                                                                                                                                                                                                |
|              |                                                                                                                                                                                                                                                                                                                                                                                                                                                      |
|              |                                                                                                                                                                                                                                                                                                                                                                                                                                                      |
| caPfGARP     | AAGAAGAAAATGGCAAAAATAGAAGAAGCAGAATTACAAAAACAAAACATGTTGATAAAGAAGAAGATAAAAAAGAAGAAAGTAAAGAAGTTGAAGAAGAAA<br>GTAAAGAAGTTCAAGAAGATGAAGAAGAAGTTGAAGAGGATGAAGAAGAGGAAGAGGAGGAAGAGGAAGAAGAGGAAAGAGGAAGAAGAGG<br>AAGAGGAAGATGAAGTAGAAGAAGATGAAGATGATGCAGAAGAAGACGAAGATGATGCTGAGGAAGATGAAGATGATGCAGAAGAAGACGATGATGCTG<br>AAGAAGATGATGATGCTGAAGAAGATGATGATGAAGATGAGGATGAAGATGAAGAAGAAGAAGATGAGGAAGAAGAAGAGGAGAGTGAAGAAGAAA<br>ATAAAAAGAAAATTAAGAAAAATGCAAAAATA |

## Supplementary Text

### Protein processing of PfGARP

*P. falciparum* exports proteins to the RBC cytoplasm and membrane using the *Plasmodium* export element (PEXEL) motif followed by its cleavage in the endoplasmic reticulum by plasmepsin V, as well as by other, non-PEXEL mediated mechanisms<sup>1</sup>. PfGARP encodes an amino terminal signal sequence/transmembrane region (aa 1-22) and an appropriately located PEXEL element (aa 48-52). To determine whether parasites process and cleave the PEXEL element, we probed parasite extracts using peptide-specific antisera generated against peptides that flank the PEXEL element (aa 31-48 and aa 504-522). As expected, both peptide-specific antibodies recognized full length (aa 1-673) recombinant PfGARP while only the antibodies raised against aa 504-522 recognized rPfGARP-A (aa 410-673). Only the antibodies raised against aa 504-522 recognized native PfGARP in trophozoite-infected RBCs confirming that the PEXEL element (and therefore the signal sequence/transmembrane domain) in PfGARP is processed and cleaved from the mature protein (**Extended Data Fig. 10**). Because mature PfGARP lacks a transmembrane domain and consensus sequences for glycosphosphatidylinositol or palmitic acid anchors, the mechanism of attachment of PfGARP to the exofacial surface of the RBC membrane remains unknown but may include interactions with RBC or trophozoite-infected RBC surface proteins. Supporting this notion, recent evidence indicates that a highly charged 28 aa peptide from PfGARP (aa 417-444) containing 5 lysine-rich repeats is able to bind to Band 3<sup>2</sup>.

### Identification and characterization of PfGARP

PfGARP was originally identified based on screening a *P. falciparum* cDNA expression library with uncharacterized sera obtained from adults living in Papua New Guinea<sup>3</sup>. In the same Tanzanian birth cohort used to clone and validate PfGARP in the present study, PfGARP was identified by RNAseq as one of only four parasite transcripts specifically upregulated in parasites infecting children compared to adults<sup>4</sup>. More recently, the short lysine-rich tandemly repeated sequences of PfGARP have been

identified as critical localization signals that traffic parasite proteins to the RBC membrane <sup>5</sup>.

- 1 Boddey, J. A. *et al.* Export of malaria proteins requires co-translational processing of the PEXEL motif independent of phosphatidylinositol-3-phosphate binding. *Nature communications* **7**, 10470, doi:10.1038/ncomms10470 (2016).
- 2 Almkadi, H. *et al.* Human erythrocyte band 3 is a host receptor for Plasmodium falciparum glutamic acid-rich protein. *Blood* **133**, 470-480, doi:10.1182/blood-2018-07-865451 (2019).
- 3 Triglia, T. *et al.* Structure of a Plasmodium falciparum gene that encodes a glutamic acid-rich protein (GARP). *Molecular and biochemical parasitology* **31**, 199-201 (1988).
- 4 Vignali, M. *et al.* NSR-seq transcriptional profiling enables identification of a gene signature of Plasmodium falciparum parasites infecting children. *The Journal of clinical investigation* **121**, 1119-1129, doi:10.1172/JCI43457 (2011).
- 5 Davies, H. M., Thalassinos, K. & Osborne, A. R. Expansion of Lysine-rich Repeats in Plasmodium Proteins Generates Novel Localization Sequences That Target the Periphery of the Host Erythrocyte. *The Journal of biological chemistry* **291**, 26188-26207, doi:10.1074/jbc.M116.761213 (2016).
